# Supplementary material for: Human MHC Class II and Invariant Chain Knock‐in Mice Mimic Rheumatoid Arthritis with Allele Restriction in Immune Response and Arthritis Association
Source: Adv Sci (Weinh). 2024 Apr 11;11(23):2401513. doi: 10.1002/advs.202401513 (PMC11187888; doi:10.1002/advs.202401513)
Supplement: Supplementary file 1 — Supporting Information [file ADVS-11-2401513-s001.pdf]

## Supporting Information

for *Adv. Sci.*, DOI 10.1002/advs.202401513

Human MHC Class II and Invariant Chain Knock-in Mice Mimic Rheumatoid Arthritis with Allele Restriction in Immune Response and Arthritis Association

*Laura Romero-Castillo\**, Taotao Li, Nhu-Nguyen Do, Outi Sareila, Bingze Xu, Viktoria Hennings, Zhongwei Xu, Carolin Svensson, Ana Oliveira-Coelho, Zeynep Sener, Vilma Urbonaviciute, Olov Ekwall, Harald Burkhardt and Rikard Holmdahl\*

## Supporting information for

# Human MHC class II and invariant chain knock-in mice mimic rheumatoid arthritis with allele restriction in immune response and arthritis association.

Laura Romero-Castillo<sup>1\*</sup>, Taotao Li<sup>1</sup>, Nhu-Nguyen Do<sup>1,2</sup>, Outi Sareila<sup>1,5</sup>, Bingze Xu<sup>1</sup>, Viktoria Hennings<sup>3</sup>, Zhongwei Xu<sup>1</sup>, Carolin Svensson<sup>1</sup>, Ana Oliveira-Coelho<sup>1</sup>, Zeynep Sener<sup>1</sup>, Vilma Urbonaviciute<sup>1</sup>, Olov Ekwall<sup>3</sup>, Harald Burkhardt<sup>2,4</sup>, Rikard Holmdahl<sup>1,5</sup>

### \*Correspondence:

Laura Romero-Castillo

Laura.romero.castillo@ki.se

Rikard Holmdahl

Rikard.holmdahl@ki.se

### This PDF file includes:

S1 to S7

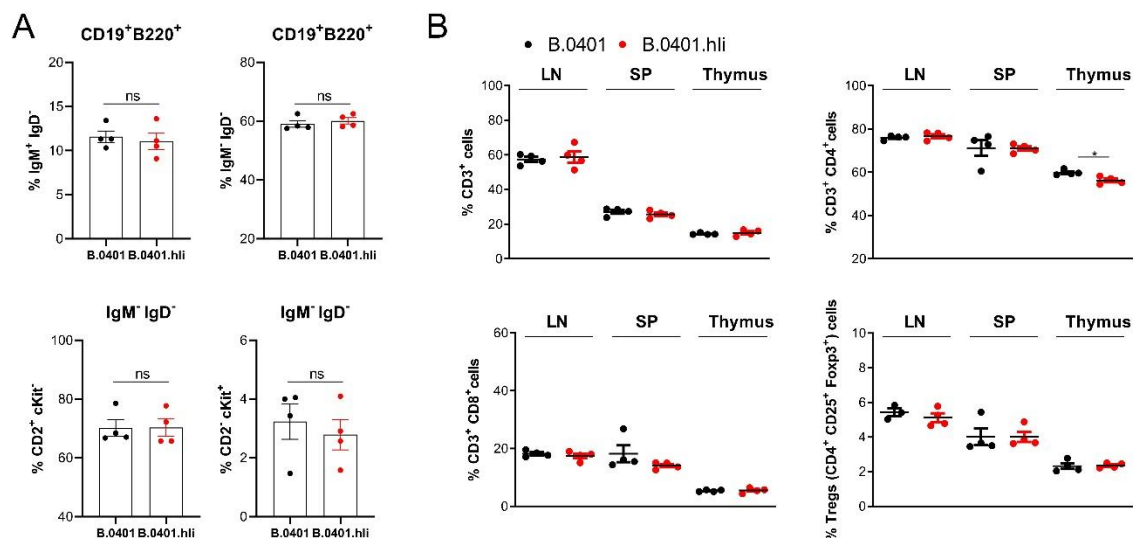

**Figure S1– Unaffected immune cell populations in the presence of Ii in naive mice.** (A) B cell development in the bone marrow with different B cell stages depicted (immature (IgM<sup>+</sup> IgD<sup>-</sup>) pre and pro (IgM<sup>-</sup> IgD<sup>-</sup>), pre (CD2<sup>+</sup> cKit<sup>-</sup>) and pro (CD2<sup>+</sup> cKit<sup>+</sup>) B cells) from B.0401 (n = 4) and B.0401.hli (n = 4) mice. (B) T cells in the lymph nodes, spleen, and thymus from B.0401 (n = 4) and B.0401.hli (n = 4) mice. Each dot represents an individual mouse. Results are expressed as mean ± SEM. Statistics were determined using a Mann-Whitney test.

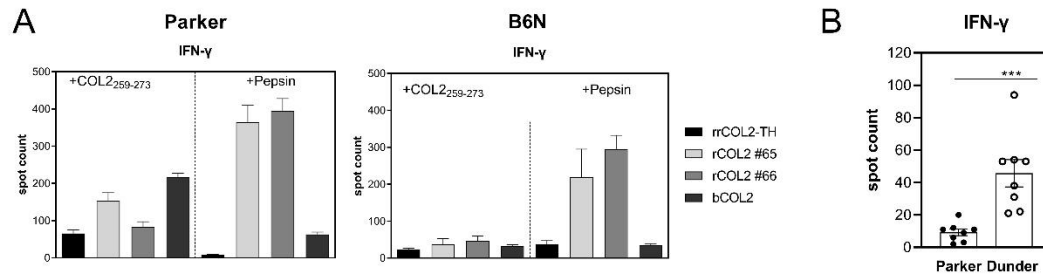

**Figure S2– T cells response by COL2 and pepsin.** (A) Parker and B6N mice were immunized with either rrCOL2-TH, different batches of rCOL2 (#65 and #66) or bCOL2, emulsified in CFA. On day 10 post-immunization, T cells from the iLNs were stimulated with either COL2<sub>259-273</sub> peptide or porcine pepsin and 24 h later the IFN $\gamma$ -secreting T cells were detected by ELISpot. 2 mice per condition were used. (B) Dunder (n = 8) and Parker (n = 8) mice were immunized with bCOL2 emulsified in CFA. At day 10 post-immunization, T cells from the iLNs were stimulated with porcine pepsin and 24 h later the IFN $\gamma$ -secreting T cells were detected by ELISpot. Each dot represents an individual mouse. Results are expressed as mean  $\pm$  SEM. Statistics in B represented experiment were determined using a two-tailed Mann-Whitney test.

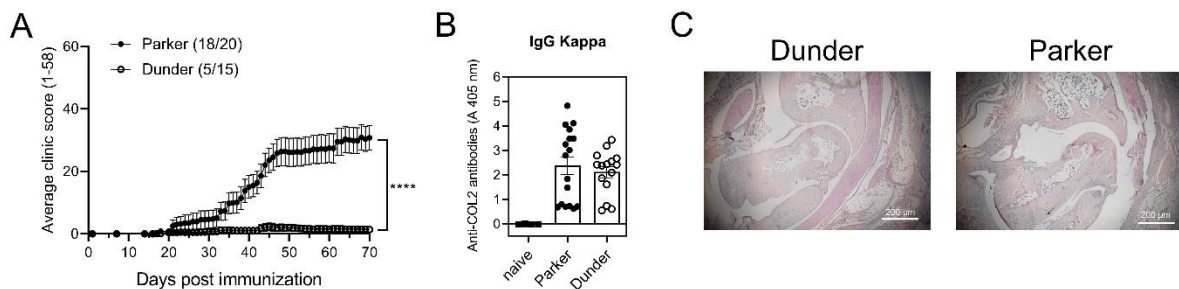

**Figure S3– CIA development in Parker (0401) and Dunder (0402) mice in Fraunhofer Institute.** (A) Arthritis severity was evaluated in male Parker (n = 20) and Dunder mice (n = 15), following immunization with bCOL2 on day 0 and boosted on day 35. Inflammation was monitored for over 70 days. Arthritis incidence is indicated in parenthesis. (B) Anti-COL2 antibody titer of total IgG (anti-kappa) from serum at terminal point measured by ELISA. Each dot represents individual mice. (C) Representative histological samples of ankle joints taken at CIA endpoint. Sections were stained with hematoxylin/eosin (H&E). Scale bars equal 20  $\mu$ m. Results are expressed as mean  $\pm$  SEM. Statistics in (A) experiment represented were determined with a two-tailed Mann-Whitney test.

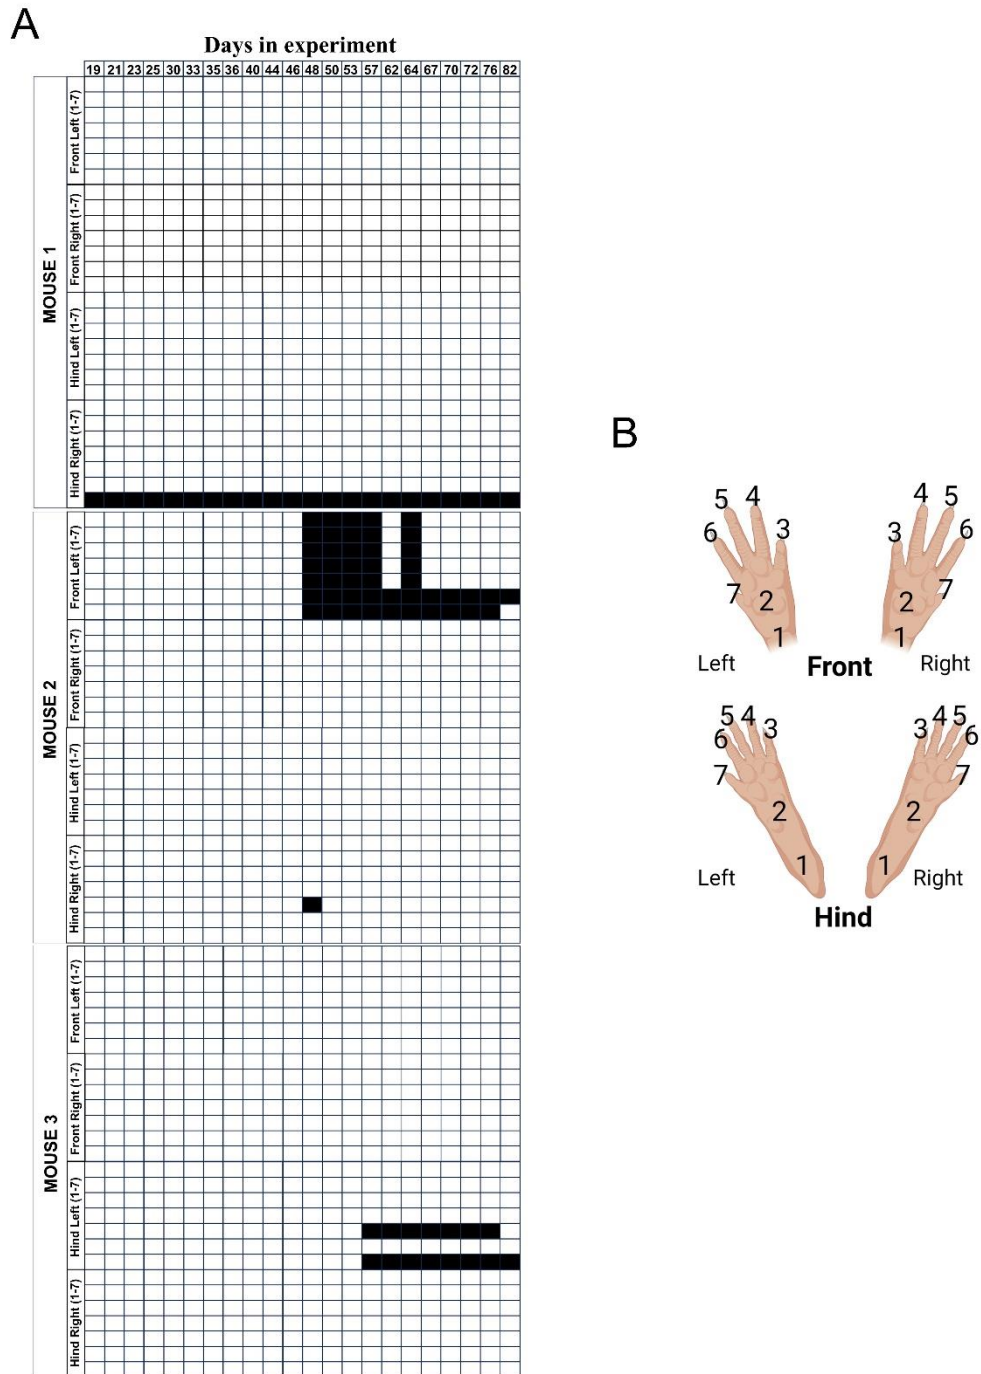

**Figure S4– Affected joints during CIA model in the arthritic P.266E mice.** To show the fluctuations in arthritis during the disease course, inflammation in each joint from a mouse with arthritis was plotted on a heatmap (A), in which each paw was numbered according to the scheme shown in B.

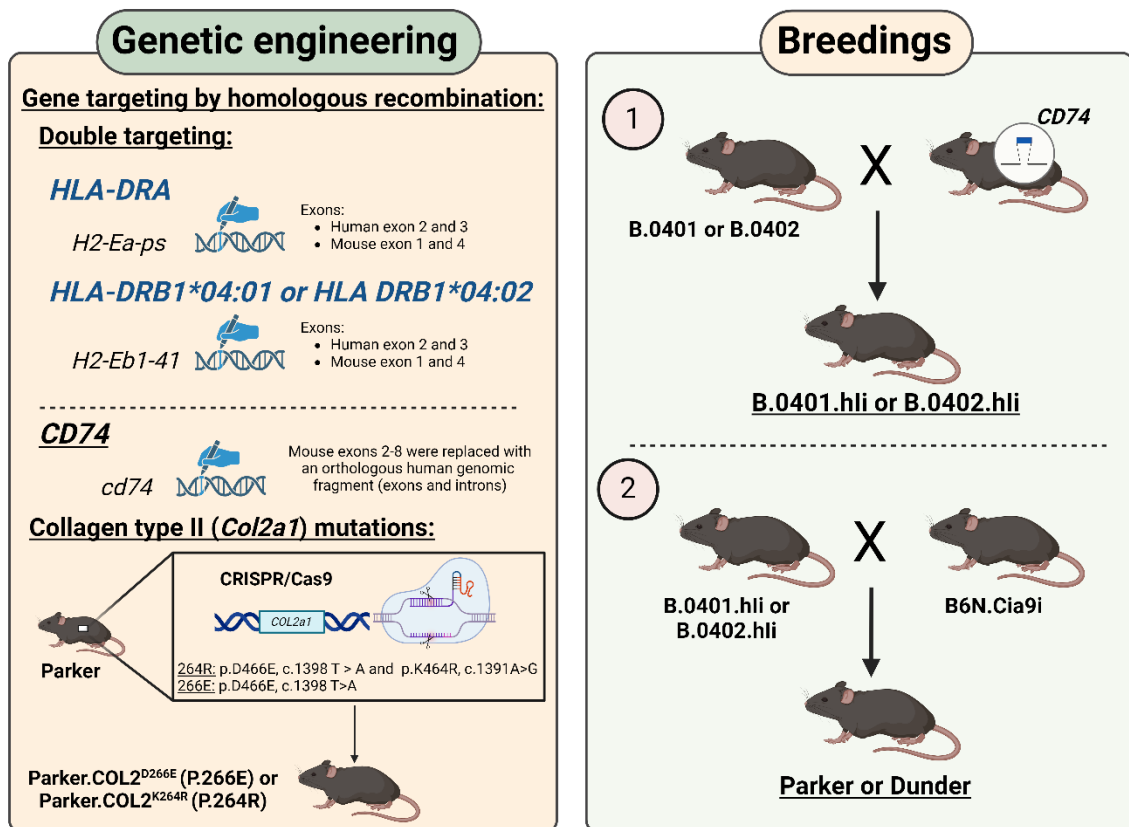

**Figure S5- Genetic engineering and mouse breeding to obtain the humanized mice used in this study.**

#### Sequence:

MIRLGAQPSVLVLLTIATVLQQCGHHHHHHHLLVPRGSEPRGPTIKPCPPCKCPGPPGPPGPMGPMGRPGPPGAPAGPGQGFQGNPGEPGEPGVSGPIGRPPGPPGAPKPGDD  
GEAGKPGKAGERGLPGPQAGRGFPCTPLPGVKGHRGYPGLDGAKEAGAGPVKGESGSPGNGSPGPMGRPLPGERGRTPGAGAAAGARGNDQPPGAPGPPGVGPAGGP  
GFLGAPGAKGEAGTGAAGPGEAGQSGRGEFGNPGSPGAPAGSNGPTDGIPIGAKGSAGAPGIAGAGFPGPGRGPPGPGQATGPIGPKGQTGEPIAGFKGEQGPKEGTGAPG  
QGAPGPAGEEGKRGARGEPGGAGPIGPPGERGAPGNRGFPQDGLAGPKGAPGERGSPGLAGPKGANGDPGRPGEPGLPGARGLTGRPGDAGPQGVKVPSPGAPGEDGRPG  
PGPQGARGQPGVMGFPKPGKANGEPKAGEKGLAGAPGLRGLPGKDGETGAAGPPGPSGPAGERGEQAGPSPGFQGLPGPPGPPGEGGKQDQGIPEAGAPGLVGPGRGE  
RGFPGERGSPGAQGLQGRPLGPTPGTDGPKAAAGPDGPPGAQGGPPGLQGMPGERGAAGIAGPKGDRGDVGEKGPEGAPGKDGGRGLTGPIGPPGAPAGANGKEVGPSPGPS  
GSTGARGAPGERGETGPPGPAGFAGFPAGDQPGAKGDDQGEAGQKGDAGAPGPGQPSGAPGPGQPTGVTGPKGARGAQGPAGATGFPGAAGRVGPPGSGNPNPGAPGPPGPA  
GKDGPKGARGDTGAPGRAGDPLQGPAGAPGEKGEPPGDDGPSGSDGPPGPGQLAGQRGIVGLPGQRGGERGFGLPGPSGEPGKQAPGASGDRGPPGPPGLTGAPAGEPG  
REGSPGADGPPGRDGAAGVKGDRGETGALGAPGAPGPPGSPGAPGTGKQDGRGEAGAGQPMGSPGAPAGARGIAGPQGRGDKGEAGEPGERGLKGHRGFTGLQGLPGPPG  
PSGDQGTSGPAGSPGRGPPGPPGPPGSGKDGSGNIGPIGPPGPRGRSGETGAPGPPGNPGPPGPPGPPGICDPSLC

| Amino acids positions | Description                                       |
|-----------------------|---------------------------------------------------|
| 1 - 25                | Native signal sequence                            |
| 26 - 33               | His-tag for purification                          |
| 34 - 39               | Thrombin cleavage site                            |
| 40 - 55               | Mouse IgG2a hinge region                          |
| 56 - 1075             | Collagen alpha-1 (II) chain triple helical region |
| 1076 - 1083           | Cys-knot                                          |

**Figure S6- The recombinant rat COL2 triple helical region (rrCOL2-TH) protein design with description of the regions at amino acids positions.**

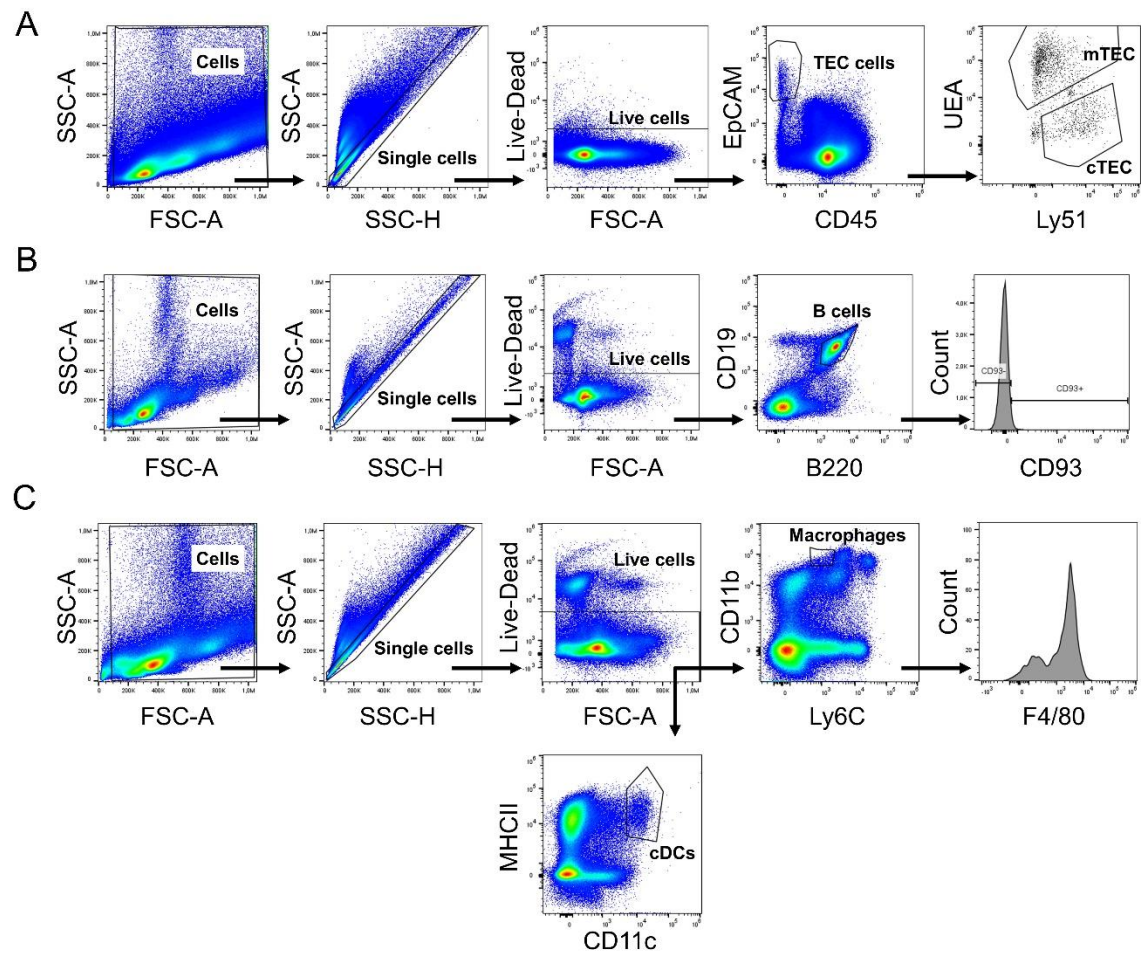

**Figure S7- Gating strategy for FACS analyses of the main Figures 1 and 2.**
